# Supplementary material for: Milk exosomes anchored with hydrophilic and zwitterionic motifs enhance mucus permeability for applications in oral gene delivery
Source: Royal Society of Chemistry journal article supplement (doi:10.1039/d3bm01089a), 2023-11-23
Supplement: d3bm01089a7.pdf [file d3bm01089a7.pdf]

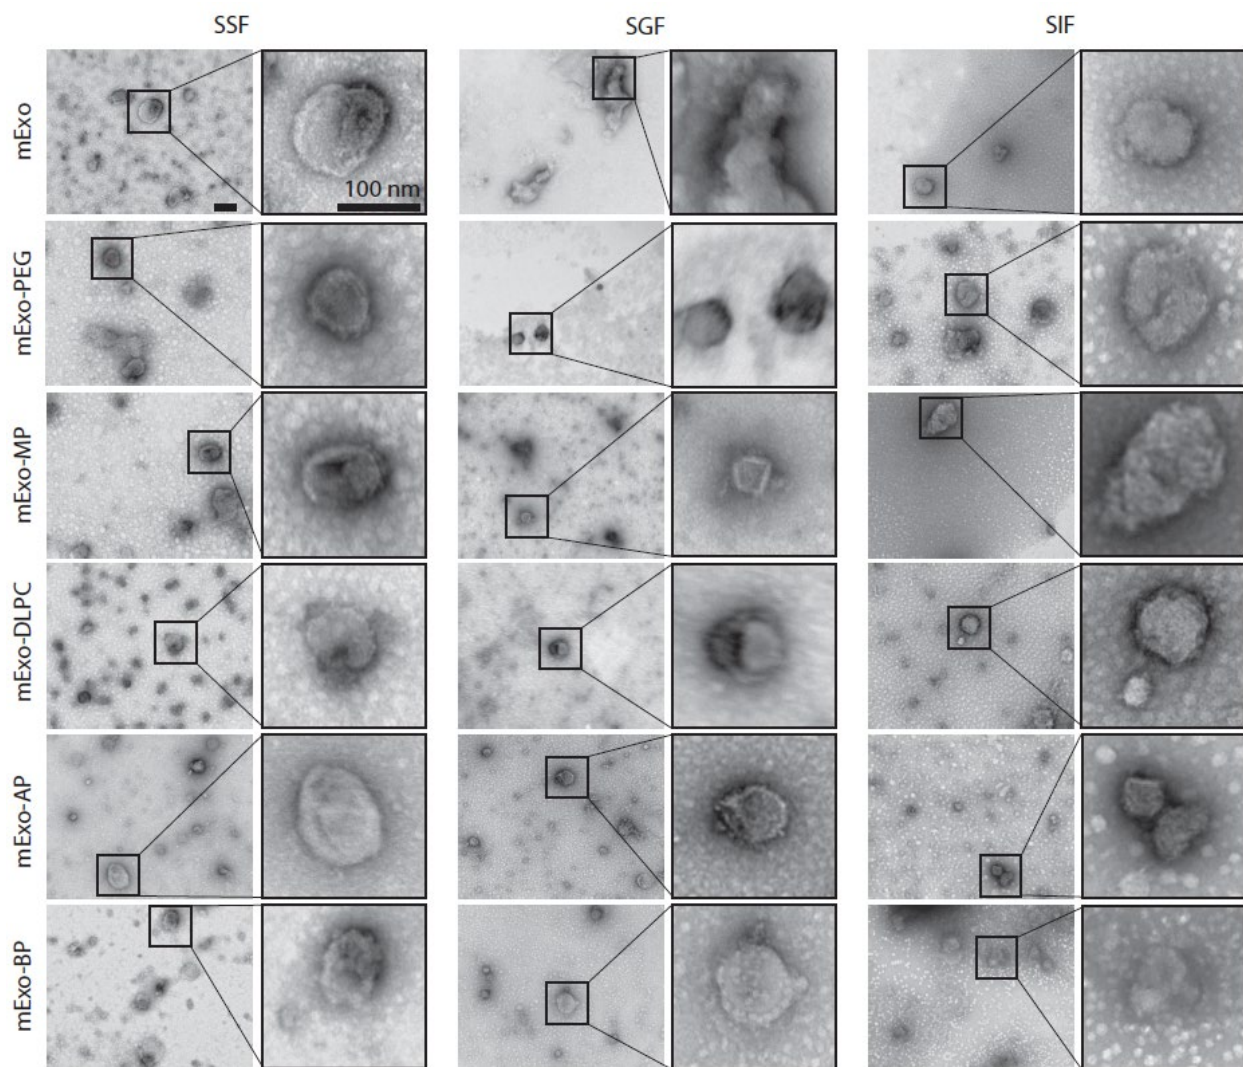

**Figure S1.** Transmission electron microscopy (TEM) images of both native and surface modified mExo after incubation in enzyme-deficient simulated saliva fluid (SSF, pH 7, 5 min), gastric fluid (SGF, pH 2.2, 2 h), and intestinal fluid (SIF, pH 7, 2 h). Scale bar = 100 nm.

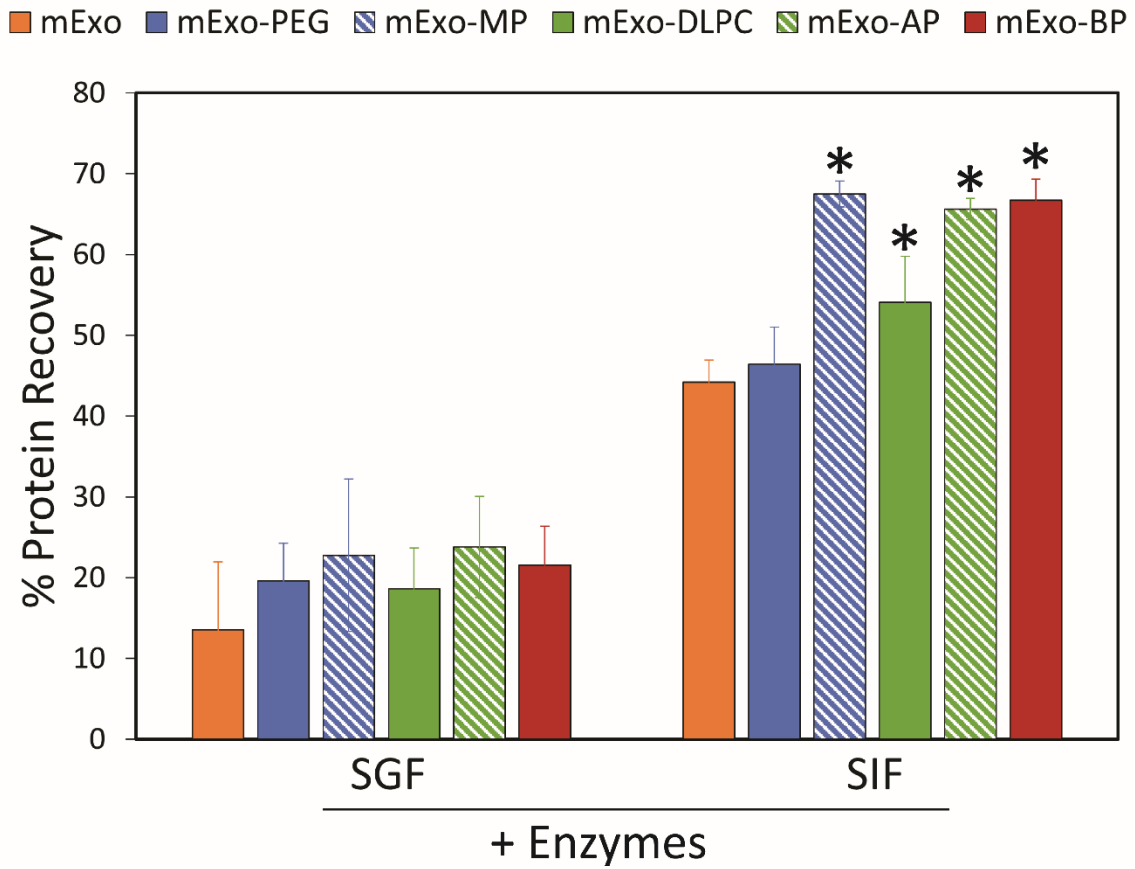

**Figure S2.** The total protein recovery of native mExo and surface modified mExo were measured after 2-hour incubation at 37°C in simulated gastric fluid with enzymes (SGF, pH 2.2) and in simulated intestinal fluid with enzymes (SIF, pH 7). (\* vs. mExo after treatment.  $p < 0.05$ ,  $N = 3$  repeats/group).

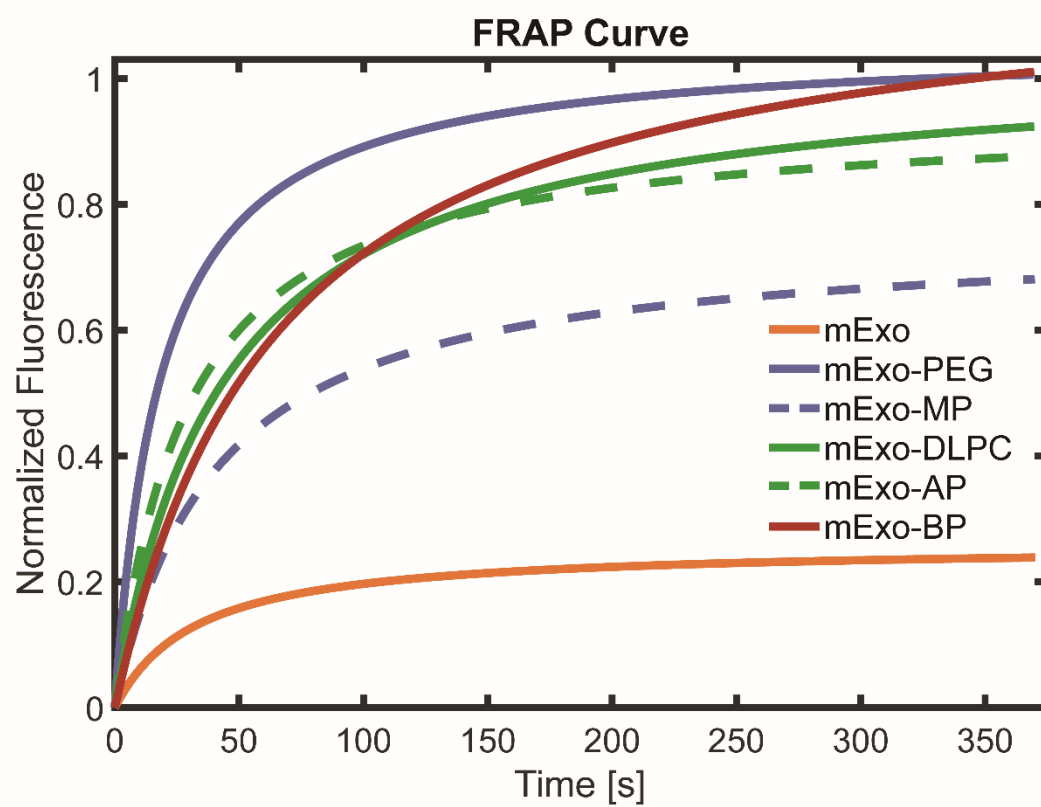

**Figure S3.** Fluorescence recovery after photobleaching (FRAP) curve for native and surface-modified mExo.

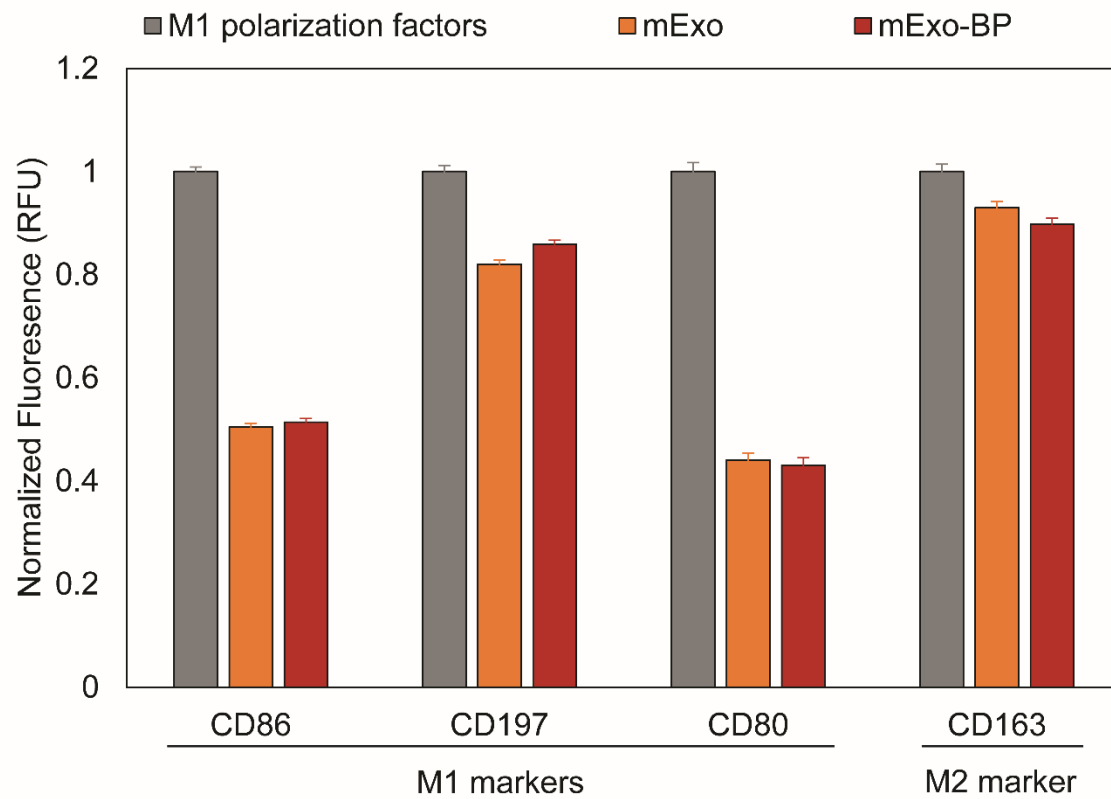

**Figure S4.** Relative surface expression of M1 (CD86, CD197, and CD80) and M2 (CD163) markers in mExo and mExo-BP treated macrophages compared to that in M1 polarized macrophages (positive control) as measured using flow cytometry.

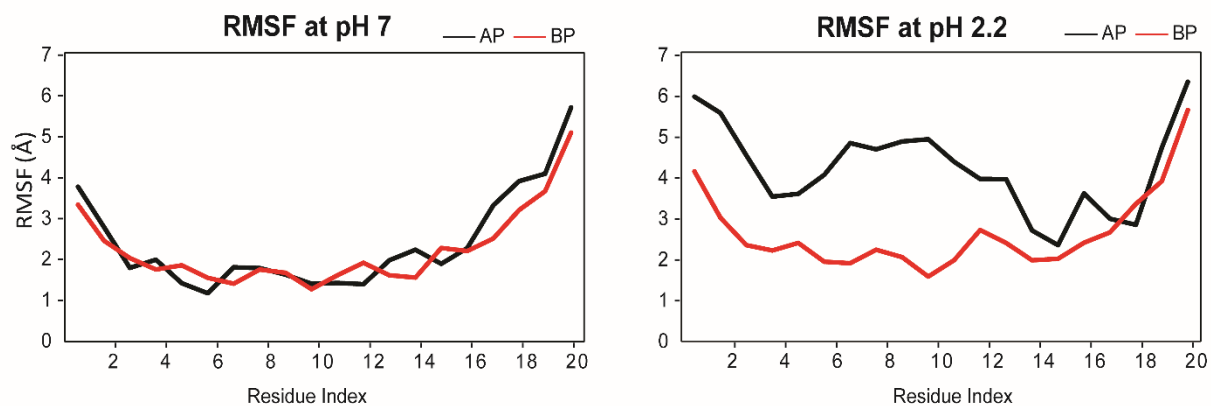

**Figure S5.** Root Mean Square Fluctuation (RMSF) profiles for AP and BP as obtained from Molecular Dynamic (MD) simulations at pH 7 and pH 2.2. The profiles provide a depiction of the local fluctuation of individual residues under different pH conditions.
